# Supplementary material for: Polypyrrole decorated metal–organic frameworks for supercapacitor devices
Source: Royal Society of Chemistry journal article supplement (doi:10.1039/d0ra02154g), 2020-01-01
Supplement: d0ra02154g1.pdf [file d0ra02154g1.pdf]

[Electronic Supplementary Information]

## Polypyrrole-decorated CPO-27-M and HKUST-1 metal organic frameworks for supercapacitor devices.

*Nigel Patterson,<sup>a</sup> Bo Xiao,<sup>\*b</sup> Anna Ignaszak<sup>\*a</sup>*

<sup>a</sup>Department of Chemistry, University of New Brunswick, 30 Dineen Drive (Toole Hall),  
Fredericton, NB, Canada.

<sup>b</sup>School of Chemistry and Chemical Engineering, Queen's University Belfast, Stranmillis  
Road (David Kier Building), Belfast BT9 5AG, UK.

\* Corresponding authors:  
b.xiao@qub.ac.uk  
anna.ignaszak@unb.ca

| MOF-conjugated polymer | Specific capacitance       | Reference work                                                                      |
|------------------------|----------------------------|-------------------------------------------------------------------------------------|
| PPy-CPO-27-Ni          | 354 F g <sup>-1</sup>      | This work                                                                           |
| PPy-CPO-27-Co          | 263 F g <sup>-1</sup>      | This work                                                                           |
| PPy-HKUST-1            | 185 F g <sup>-1</sup>      | This work                                                                           |
| PPy-CC/ZIF-67          | 284 F g <sup>-1</sup>      | Dalton Trans. (2018) 47, 13472-13478                                                |
| PPy-CFs@UiO-66         | 90 F g <sup>-1</sup>       | ACS Appl. Mater. Interfaces (2018) 10, 18021-18028                                  |
| NENU-5/PPy-0.15        | 779 F g <sup>-1</sup>      | ACS Appl. Mater. Interfaces (2018) 10, 32265-32270                                  |
| PPy-2-ZIF              | 554 F g <sup>-1</sup>      | ACS Appl. Mater. Interfaces (2018) 10, 38737-38744                                  |
| PPy-Ni-MOF             | 715 F g <sup>-1</sup>      | RSC Adv. (2020) 10, 12129-12134                                                     |
| PPy-MIL-51(Al)*        | 0.51 F cm <sup>-2</sup>    | Electrochimica Acta (2020) 336, 13574 (1-12)                                        |
| PPy-NiCo-MOF@PNTs      | 1109 F g <sup>-1</sup>     | Applied Surface Science (2020) 507, 145089 (1-8)                                    |
| PPy-Cu-CAT-NWAs*       | 0.252 F cm <sup>-2</sup>   | Adv. Energy Mater. (2020) 10, 1901892 (1-9)                                         |
| PPy-UiO-66@cotton      | 565 F g <sup>-1</sup>      | Cellulose (2019) 26, 3387-3399                                                      |
| PANI-Zn-MOF            | 477 F g <sup>-1</sup>      | J. Power Source (2016) 316, 176-182                                                 |
| PANI-ZIF67-CC          | 371 F g <sup>-1</sup>      | J. Am. Chem. Soc. (2015) 137, 4920-4923                                             |
| PANI-CNT@ZIF-67-CC     | 371 F g <sup>-1</sup>      | Electrochimica Acta (2017) 240, 16-23                                               |
| PANI-Co-MOF            | 504 F g <sup>-1</sup>      | Inorganica Chimica Acta (2020) 502, 1193932 (1-11)                                  |
| PANI-MOF               | 1268 F g <sup>-1</sup>     | Nanotechnology (2019) 30, 085404 (1-13)                                             |
| PANI-(ZIF-8, ZIF-67)   | 89 – 746 F g <sup>-1</sup> | AIP Advances (2019) 9, 055032 (1-5)                                                 |
| PANI-Cu-MOF            | 734 F g <sup>-1</sup>      | Journal of Inorganic and Organometallic Polymers and Materials (2019) 29, 1838-1847 |
| Ni-MOF/PANI/NF*        | 3.6 F cm <sup>-2</sup>     | Dalton Trans. (2019) 48, 4119-4123                                                  |
| PANI-HKUST-1           | 270 F g <sup>-1</sup>      | Physica E: Low-dimensional Systems and Nanostructures (2018) 99, 16–23              |
| PANI-ZIF-67-CC*        | 2.1 F cm <sup>-2</sup>     | J. Am. Chem. Soc. (2015) 137, 4920-4923                                             |
| PEDOT-GO/UiO-66-C*     | 0.1 F cm <sup>-2</sup>     | ChemistrySelect (2016) 2, 285–289                                                   |
| PEDOT/HKUST-1-CNTF*    | 0.08 F cm <sup>-2</sup>    | Materials Chemistry and Physics (2016) 179, 166e173167                              |

Table S1: Specific capacitances of various reported supercapacitive MOF composites.

Table S1 summarizes various capacitive electrodes comprising conjugated polymers (including PPy, polyaniline (PANI), and poly(3,4-ethylenedioxythiophene) (PEDOT)), MOFs, and other conducting additives. The  $C_s$  stated in this work is within the range of the most performing PPy-MOF electrodes currently studied. Although some outstanding  $C_s$  is demonstrated, for example in PPy-NiCo-MOF@PNTs and PPy-Ni-MOF, it is important to keep in mind that in both cases the total conductivity of the electrode is significantly higher than in our system due to the presence of Ni or Ni/Co metal nanoparticles. This unquestionably helps charge transfer within the structure of the MOF and the semiconducting polymer. Higher  $C_s$  for the NENU-5/PPy-0.15 system (sans additional metal particles) is related to the redox activity of NENU-5 itself, which ultimately contributes in pseudocapacitance of the electrode. In particular, PMo12 units in the MOF's framework facilitate electron transfer at the  $\text{Mo}^{6+}/\text{Mo}^{4+}$  active centers.

Several other reasons are emphasized when comes to improvement of  $C_s$ . One is the microporosity of the MOF which can be problematic when it comes to pore blockage by a coated polymer. On the other hand, ultra-small pores prevent the MOF from dissolving in the electrolyte, which in some cases is taken as an advantage when it comes to the long-term stability of the electrode. Another important contributor to the high  $C_s$  of such electrodes are the  $\pi - \pi$  conjugations between MOFs and PPy. This is believed to facilitate the polymerization process on the surface of MOFs, resulting in uniformly distributed nanostructured polymer particles, resulting in remarkable improvement of electrochemical performance. In summary, the optimized particle sizes of MOFs vs. size of polymer and well-designed porosity both promote the transport of electrolyte ions that is critical to the mechanism of double-layer and pseudocapacitance.

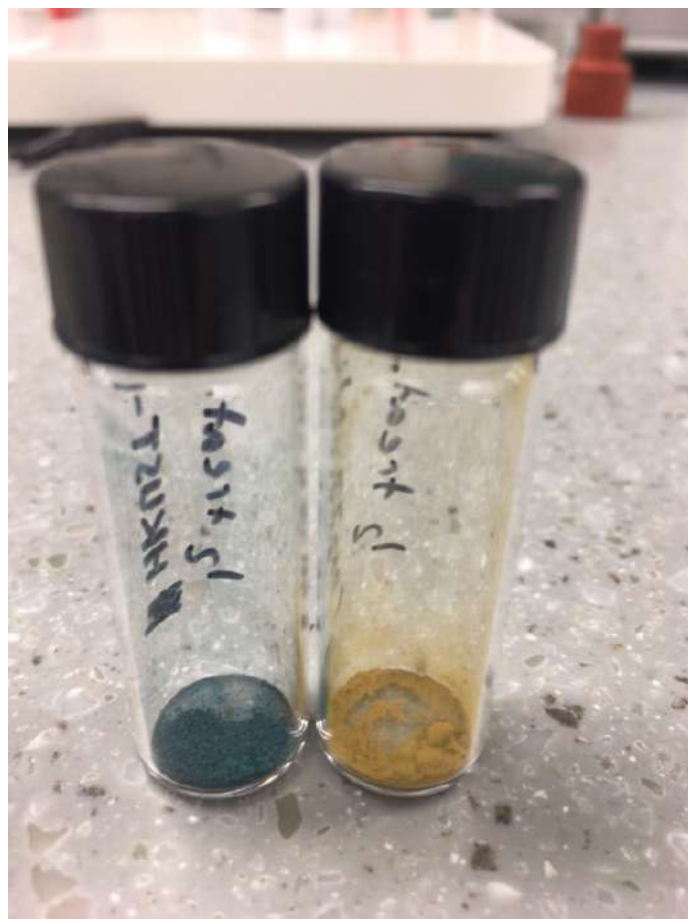

Figure S1: MOFs HKUST-1 (left) and CPO-27-Ni (right) darkened after immersion in iodine

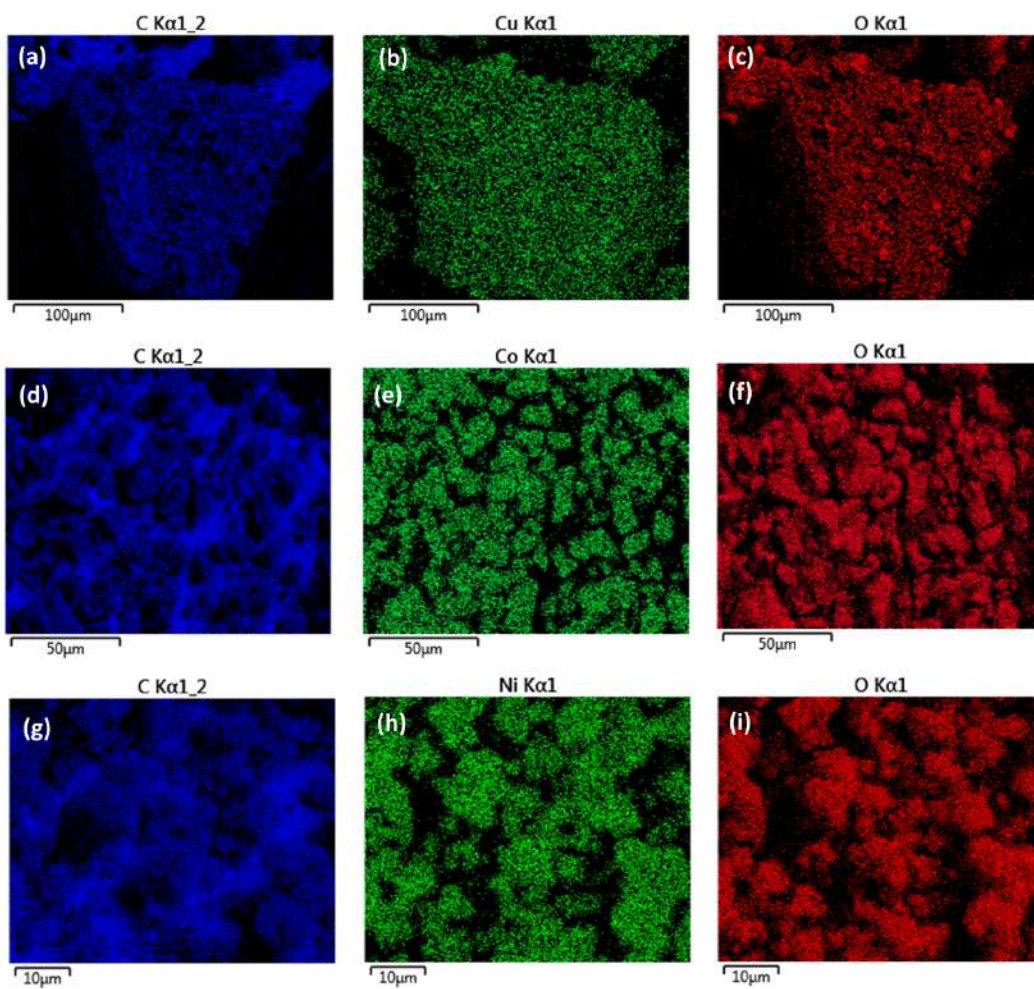

Figure S2: EDS images of PPy-d-MOFs (a,b,c) PPy-HKUST-1, (d,e,f) PPy-CPO-27-Co, (g,h,i) PPy-CPO-27-Ni showing C, O, and metal composition.

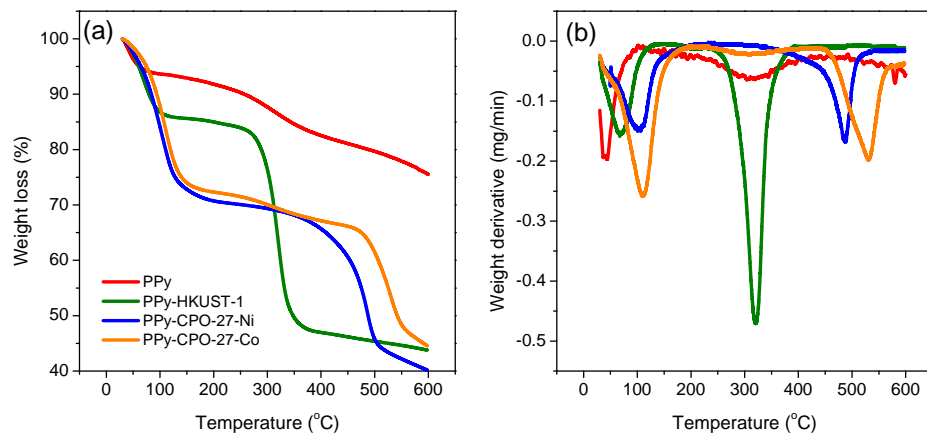

Figure S3: (a) All PPy-d-MOF TGA curves with pure PPy as well. (b) First derivative graphs of the same.

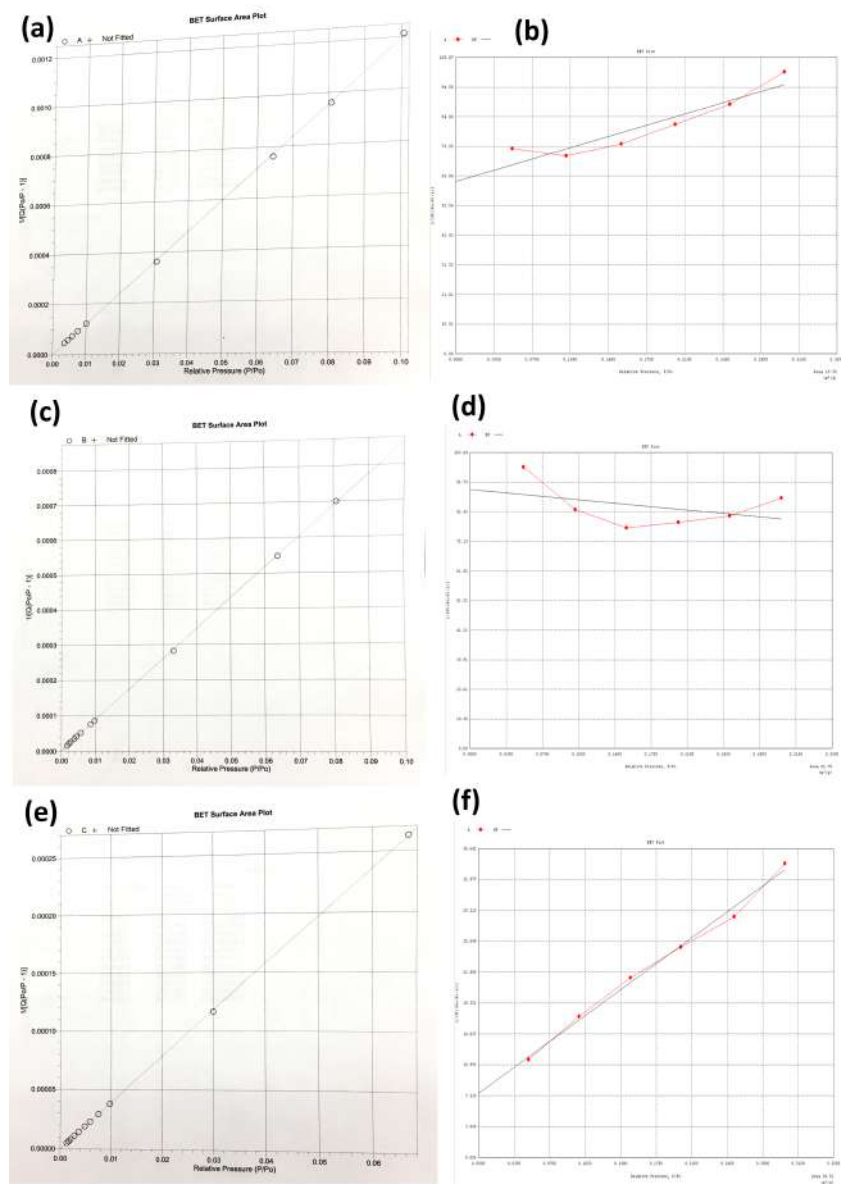

Figure S4: Plots of the BET surface area for (a) CPO-27-Ni, (b) PPy-CPO-27-Ni, (c) CPO-27-Co, (d) PPy-CPO-27-Co, (e) HKUST-1, (f) PPy-HKUST-1.

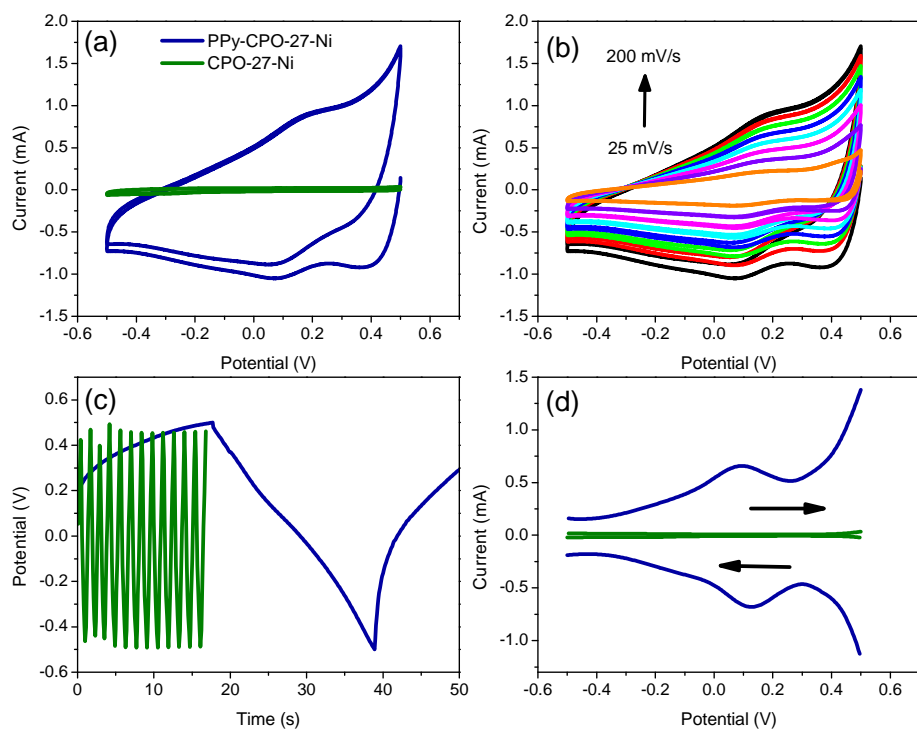

Figure S5: Comparison of plain vs PPy-CPO-27-Ni. (a) CV, (b) CV of just PPy-CPO-27-Ni at varying scan rates, (c) GCD, d) DPV.



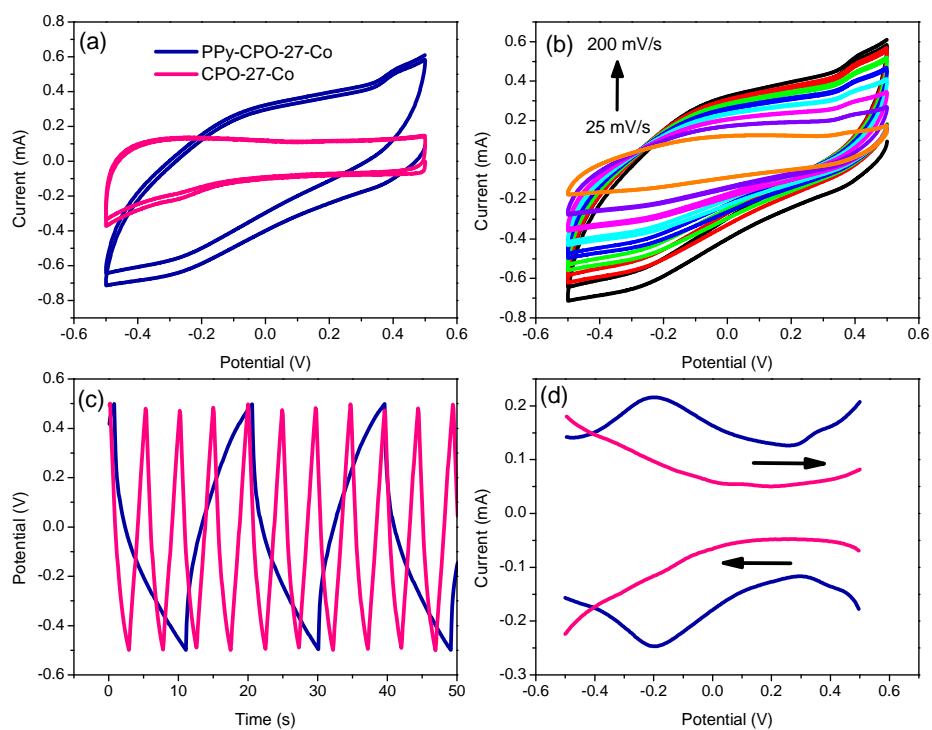

Figure S6: Comparison of plain vs PPy-CPO-27-Co. (a) CV, (b) CV of just PPy-CPO-27-Co at varying scan rates, (c) GCD, d) DPV.

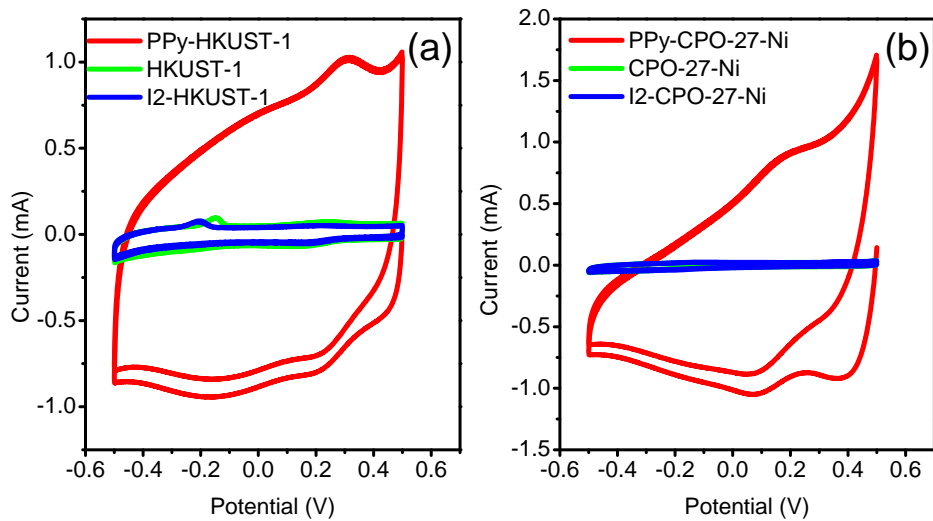

Figure S7: Contribution of plain MOF or I<sub>2</sub>-doped MOF (a) HKUST-1, (b) CPO-27-M to overall supercapacitance in PPy-d-MOFs.

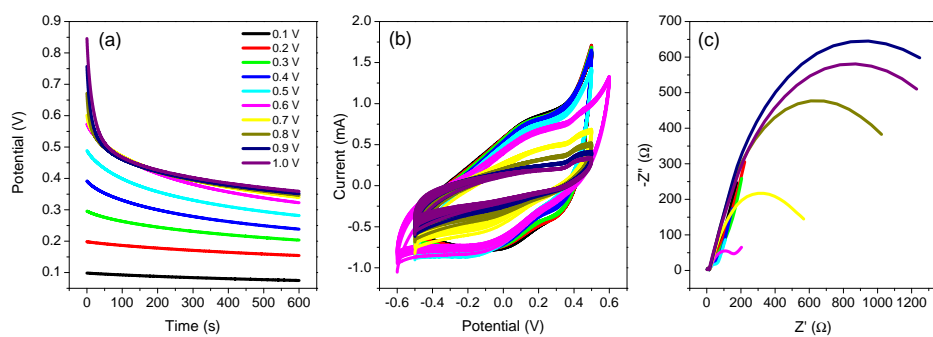

Figure S8: Behaviour of PPy-CPO-27-Ni after successive charging at different potentials. (a) OCP, (b) CV, (c) EIS.

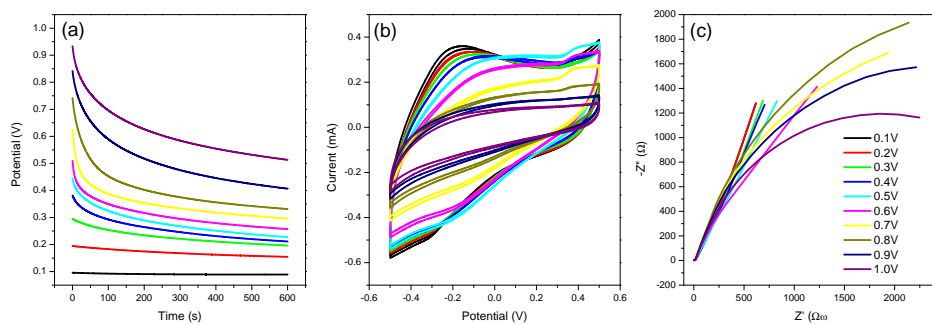

Figure S9: Behaviour of PPy-CPO-27-Co after successive charging at different potentials. (a) OCP, (b) CV, (c) EIS.

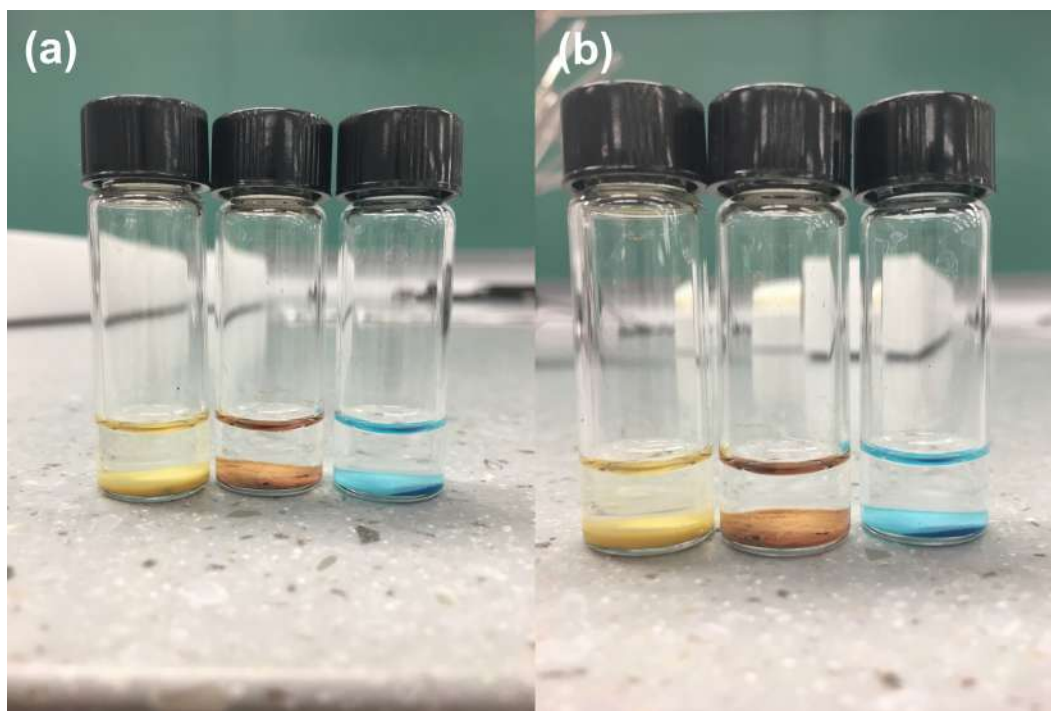

Figure S10: Stability of MOFs in ink (a) initial, (b) after 48 hours, evidenced by lack of discolouration of ink indicating leaching of metals/compounds.
